# Supplementary material for: Vaccine effectiveness against COVID-19 hospitalisation in adults (≥ 20 years) during Alpha- and Delta-dominant circulation: I-MOVE-COVID-19 and VEBIS SARI VE networks, Europe, 2021
Source: PubMed Central journal article supplement (PMC10668259; doi:10.2807/1560-7917.es.2023.28.47.2300186), 2023-11-23
Supplement: 23-00186_ROSE_Supplement.pdf [file 23-00186_ROSE_Supplement.pdf]

This supplementary material is hosted by *Eurosurveillance* as supporting information alongside the article “Vaccine effectiveness against COVID-19 hospitalisation in adults ( $\geq 20$  years) during Alpha- and Delta-dominant circulation: I-MOVE-COVID-19 and VEBIS SARI VE networks, Europe, 2021”, on behalf of the authors, who remain responsible for the accuracy and appropriateness of the content. The same standards for ethics, copyright, attributions and permissions as for the article apply. Supplements are not edited by *Eurosurveillance* and the journal is not responsible for the maintenance of any links or email addresses provided therein.

#### Note about distribution of vaccinated patients across sites

The 12 completely vaccinated cases were distributed across five of the eight sites providing data during the Alpha period, while the partially vaccinated cases were found in all eight sites. Partially and completely vaccinated controls were from all eight sites, except for one which had no completely vaccinated SARI patients during the Alpha period.

**Supplementary Table S1.** Sensitivity analyses: Effectiveness of COVID-19 complete primary series vaccination (PSV) with and without mRNA booster dose against hospitalisation among adults ( $\geq 20$  years) in patients with (a) no known prior infection and (b) severe outcomes only, all vaccine products combined, Alpha- and Delta-dominant periods, I-MOVE-COVID-19 and VEBIS hospital networks, Europe, 13 Dec 2021–31 Jul 2022

| <b>Analysis (a1): Alpha period. Vaccine effectiveness of partial and complete PSV (all products combined), overall and by age group; SARI patients with no known prior infection</b>                                                                                                     |                                                                    |                                                |                          |                                |
|------------------------------------------------------------------------------------------------------------------------------------------------------------------------------------------------------------------------------------------------------------------------------------------|--------------------------------------------------------------------|------------------------------------------------|--------------------------|--------------------------------|
|                                                                                                                                                                                                                                                                                          | Vaccinated/unvaccinated cases;<br>Vaccinated/unvaccinated controls |                                                | VE <sup>a</sup> (95% CI) |                                |
|                                                                                                                                                                                                                                                                                          | Partial PSV                                                        | Complete PSV                                   | Partial PSV              | Complete PSV                   |
| <b>Any PSV product</b>                                                                                                                                                                                                                                                                   | <b>7 sites;<sup>b</sup> N=1378<sup>c</sup></b>                     | <b>7 sites;<sup>b</sup> N=1330<sup>c</sup></b> |                          |                                |
| All $\geq 20$                                                                                                                                                                                                                                                                            | 56/891; 92/339                                                     | 12/891; 88/339                                 | 45 (15–64)               | 86 (71–93)                     |
| Age group                                                                                                                                                                                                                                                                                |                                                                    |                                                |                          |                                |
| 20–59                                                                                                                                                                                                                                                                                    | 6/200; 3/59                                                        | 1/200; 4/59                                    | NC <sup>d</sup>          | NC <sup>d</sup>                |
| 60–79                                                                                                                                                                                                                                                                                    | 30/490; 54/177                                                     | 1/490; 13/177                                  | 56 (19–76)               | NC <sup>d</sup>                |
| $\geq 80$                                                                                                                                                                                                                                                                                | 20/201; 35/103                                                     | 10/201; 71/103                                 | 33 (-44–69)              | 77 (44–90)                     |
| <b>Analysis (a2): Delta period. Vaccine effectiveness of complete PSV regardless of time since last PSV dose, and PSV plus mRNA booster <math>\geq 150</math> days from last PSV dose (all products combined), overall and by age group; SARI patients with no known prior infection</b> |                                                                    |                                                |                          |                                |
|                                                                                                                                                                                                                                                                                          | Vaccinated/unvaccinated cases;<br>Vaccinated/unvaccinated controls |                                                | VE <sup>a</sup> (95% CI) |                                |
|                                                                                                                                                                                                                                                                                          | Complete PSV only                                                  | Complete PSV plus mRNA booster                 | Complete PSV only        | Complete PSV plus mRNA booster |
| <b>Any PSV product</b>                                                                                                                                                                                                                                                                   | <b>10 sites;<sup>e</sup> N=2481<sup>f</sup></b>                    |                                                |                          |                                |
| All $\geq 20$                                                                                                                                                                                                                                                                            | 503/753; 1005/220                                                  |                                                | 80 (74–84)               | NC <sup>g</sup>                |
| Age group                                                                                                                                                                                                                                                                                |                                                                    |                                                |                          |                                |
| 20–59                                                                                                                                                                                                                                                                                    | 102/420; 217/84                                                    | NC <sup>g</sup>                                | 88 (82–92)               | NC <sup>g</sup>                |
| 60–79                                                                                                                                                                                                                                                                                    | 233/239; 465/87                                                    | NC <sup>g</sup>                                | 79 (70–85)               | NC <sup>g</sup>                |
| $\geq 80$                                                                                                                                                                                                                                                                                | 168/94; 323/49                                                     | NC <sup>g</sup>                                | 34 (-15–62)              | NC <sup>g</sup>                |
| <b>Analysis (b1): Alpha period. Vaccine effectiveness (VE) of partial and complete primary series vaccination (PSV; all products combined), overall and by age group; SARI patients with severe outcomes only (admitted to intensive care or in-hospital death)</b>                      |                                                                    |                                                |                          |                                |

|                        | Vaccinated/unvaccinated cases;<br>Vaccinated/unvaccinated controls |                                               | VE <sup>a</sup> (95% CI) |                 |
|------------------------|--------------------------------------------------------------------|-----------------------------------------------|--------------------------|-----------------|
|                        | Partial PSV                                                        | Complete PSV                                  | Partial PSV              | Complete PSV    |
| <b>Any PSV product</b> | <b>5 sites;<sup>i</sup> N=341<sup>l</sup></b>                      | <b>5 sites;<sup>i</sup> N=330<sup>l</sup></b> |                          |                 |
| All ≥20                | 14/290; 7/30                                                       | 2/290; 8/30                                   | NC <sup>h</sup>          | NC <sup>d</sup> |
| Age group              |                                                                    |                                               |                          |                 |
| 20–59                  | 2/55; 0/5                                                          | 0/55; 0/5                                     | NC <sup>d</sup>          | NC <sup>d</sup> |
| 60–79                  | 5/164; 4/14                                                        | 0/164; 2/14                                   | NC <sup>d</sup>          | NC <sup>d</sup> |
| ≥80                    | 7/71; 3/11                                                         | 2/71; 6/11                                    | NC <sup>d</sup>          | NC <sup>d</sup> |

**Analysis (b2): Delta period. Vaccine effectiveness (VE) of primary series vaccination (PSV) received ≥150 days prior to onset and PSV plus mRNA booster dose, with booster received ≥150 days from receipt of last PSV dose (all products combined), all ≥20 years; SARI patients with severe outcomes only (admitted to intensive care or in-hospital death)**

|                        | Vaccinated/unvaccinated cases;<br>Vaccinated/unvaccinated controls |                                              | VE <sup>a</sup> (95% CI) |                                |
|------------------------|--------------------------------------------------------------------|----------------------------------------------|--------------------------|--------------------------------|
|                        | Complete PSV only                                                  | Complete PSV plus mRNA booster               | Complete PSV only        | Complete PSV plus mRNA booster |
| <b>Any PSV product</b> | <b>7 sites;<sup>k</sup> N=78<sup>l</sup></b>                       | <b>3 sites;<sup>g</sup> N=42<sup>l</sup></b> |                          |                                |
| All ≥20                | 16/30; 26/6                                                        | 3/28; 7/4                                    | 84 (20–97)               | NC <sup>d</sup>                |

**Analysis (b3): Delta period. Vaccine effectiveness (VE) of primary series vaccination (PSV) received ≥14 days prior to onset (all products combined), overall and by age group; SARI patients with severe outcomes only (admitted to intensive care or in-hospital death)**

|                        | Vaccinated/unvaccinated cases;<br>Vaccinated/unvaccinated controls |  | VE <sup>a</sup> (95% CI) |  |
|------------------------|--------------------------------------------------------------------|--|--------------------------|--|
|                        | Complete PSV only                                                  |  | Complete PSV only        |  |
| <b>Any PSV product</b> | <b>8 sites;<sup>m</sup> N=117<sup>n</sup></b>                      |  |                          |  |
| All ≥20                | 35/34; 42/6                                                        |  | 80 (37–94)               |  |

I-MOVE: Influenza – Monitoring vaccine effectiveness in Europe; PSV: primary series vaccination; VE: vaccine effectiveness; VEBIS: Vaccine Effectiveness, Burden and Impact Studies.

<sup>a</sup>Odds ratio adjusted by country, time (restricted cubic spline of swab date or swab month as categorical variable, depending on model), age (restricted cubic spline or age as linear variable, depending on model), sex, presence/absence of chronic condition (asthma, diabetes, heart disease, lung disease).

<sup>b</sup>Seven sites: Belgium, Croatia, France, Lithuania, Navarra, the Netherlands and Spain.

<sup>c</sup>N=1378 and 1330 after dropping all records of patients with known prior infection in those with partial primary series vaccination (PSV) only, and in those with complete PSV, respectively.

<sup>d</sup>Numbers are too small to provide robust VE estimates (<20 total vaccinated cases and controls).

<sup>e</sup>Ten sites: Belgium, Croatia, France, Ireland, Lithuania, Malta, Navarra, the Netherlands, Portugal and Spain.

<sup>f</sup>N=2481 after dropping all records of patients who did not known prior infection, in those with complete PSV only.

<sup>g</sup>Two of the three study sites with data in this category had no vaccinated cases, so this sensitivity analysis could not be performed.

<sup>h</sup>Numbers are too small to provide robust VE estimates (penalised logistic regression showed evidence of small sample bias).

<sup>i</sup>Five sites: Belgium, Croatia, Navarra, the Netherlands and Spain.

<sup>l</sup>N=341 and 330 after dropping all records of patients who did not have a severe outcome (or with this information missing), in those with partial and complete PSV, respectively.

<sup>k</sup>Seven sites: Belgium, France, Malta, Navarra, the Netherlands, Portugal and Spain.

<sup>l</sup>N=78 after dropping all records of patients who did not have a severe outcome (or with this information missing).

<sup>m</sup>Eight sites: Belgium, France, Ireland, Malta, Navarra, the Netherlands, Portugal and Spain.

<sup>n</sup>N=117 after dropping all records of patients who did not have a severe outcome (or with this information missing).

**Supplementary Table S2.** Effectiveness of COVID-19 partial and complete primary series vaccination (PSV) against hospitalisation among adults (≥20 years) in the PSV target group

during Alpha and Delta periods, by dose, age group and vaccine product, I-MOVE-COVID-19 and VEBIS hospital networks, Europe, March–December 2021 (N=4736)\*

**Analysis 1: Vaccine effectiveness of partial and complete PSV, by vaccine product and age group, Alpha period (March–June 2021; N=1625)**

| PSV vaccine product            | Vaccinated/unvaccinated cases; vaccinated /unvaccinated controls |                                                | VE <sup>a</sup> (95% CI) |                 |                 |                 |
|--------------------------------|------------------------------------------------------------------|------------------------------------------------|--------------------------|-----------------|-----------------|-----------------|
|                                | Partial PSV                                                      | Complete PSV                                   | Partial PSV              |                 | Complete PSV    |                 |
| <b>All products combined</b>   | <b>7 sites;<sup>b</sup> N=1523<sup>c</sup></b>                   | <b>7 sites;<sup>b</sup> N=1469<sup>d</sup></b> |                          |                 |                 |                 |
| All ≥20 years                  | 62/1013; 94/354                                                  | 12/1013; 90/354                                | 43                       | (13 to 62)      | 86              | (71 to 93)      |
| Age group                      |                                                                  |                                                |                          |                 |                 |                 |
| 20–59                          | 8/238; 3/62                                                      | 1/238; 4/62                                    | NC <sup>e</sup>          | NC <sup>e</sup> | NC <sup>e</sup> | NC <sup>e</sup> |
| 60–79                          | 33/557; 55/183                                                   | 1/557; 13/183                                  | 56                       | (21 to 76)      | NC <sup>e</sup> | NC <sup>e</sup> |
| ≥80                            | 21/218; 36/109                                                   | 10/218; 73/109                                 | 29                       | (-49 to 66)     | 77              | (44 to 90)      |
| Chronic condition <sup>f</sup> |                                                                  |                                                |                          |                 |                 |                 |
| No                             | 22/457; 16/101                                                   | 2/457; 22/101                                  | 18                       | (-89 to 64)     | 95              | (75 to 99)      |
| Yes                            | 40/556; 78/253                                                   | 10/556; 68/253                                 | 47                       | (14 to 68)      | 80              | (57 to 91)      |
| <b>Comirnaty PSV</b>           | <b>7 sites;<sup>b</sup> N=1463</b>                               | <b>6 sites;<sup>g</sup> N=1434</b>             |                          |                 |                 |                 |
| All ≥20 years                  | 33/1013; 63/354                                                  | 12/991; 82/349                                 | 45                       | (8 to 67)       | 85              | (69 to 92)      |
| Age group                      |                                                                  |                                                |                          |                 |                 |                 |
| 20–59                          | 3/238; 3/62                                                      | 1/225; 2/61                                    | NC <sup>e</sup>          |                 | NC <sup>e</sup> | NC <sup>e</sup> |
| 60–79                          | 14/557; 30/183                                                   | 1/548; 9/181                                   | 56                       | (4 to 80)       | NC <sup>e</sup> | NC <sup>e</sup> |
| ≥80                            | 16/218; 30/109                                                   | 10/218; 71/107                                 | 22                       | (-70 to 65)     | 75              | (42 to 90)      |
| Chronic condition <sup>f</sup> |                                                                  |                                                |                          |                 |                 |                 |
| No                             | 9/457; 10/101                                                    | 2/445; 19/101                                  | NC <sup>e</sup>          |                 | 94              | (68 to 99)      |
| Yes                            | 24/556; 53/253                                                   | 10/546; 63/248                                 | 47                       | (4 to 70)       | 80              | (56 to 91)      |
| <b>Vaxzevria PSV</b>           | <b>6 sites;<sup>g</sup> N=1358</b>                               | <b>0 sites;<sup>h</sup> N=0</b>                |                          |                 |                 |                 |
| All ≥20                        | 21/975; 19/343                                                   | NC                                             | 31                       | (-46 to 67)     |                 | NC              |
| Age group                      |                                                                  |                                                |                          |                 |                 |                 |
| 20–59                          | 4/229; 0/60                                                      | NC                                             | NC <sup>e</sup>          | NC              |                 | NC              |
| 60–79                          | 15/538; 18/180                                                   | NC                                             | 45                       | (-34 to 78)     |                 | NC              |
| ≥80                            | 2/208; 1/103                                                     | NC                                             | NC <sup>e</sup>          | NC              |                 | NC              |
| Chronic condition <sup>f</sup> |                                                                  |                                                |                          |                 |                 |                 |
| No                             | 10/442; 4/97                                                     | NC                                             | NC <sup>e</sup>          | NC              |                 | NC              |
| Yes                            | 11/533; 15/246                                                   | NC                                             | 48                       | (-33 to 80)     |                 | NC              |

**Analysis 2: Vaccine effectiveness (VE) in patients eligible for a booster dose. Group A: those who received complete primary series vaccination (PSV) only, with last PSV dose administered ≥ 150 days before onset. Group B: those who received PSV plus an mRNA booster dose administered ≥ 150 days after last PSV dose (June–December 2021; N=3111)**

| PSV vaccine product            | Vaccinated/unvaccinated cases; vaccinated /unvaccinated controls |                                              | VE <sup>a</sup> (95% CI) |             |                                       |                 |
|--------------------------------|------------------------------------------------------------------|----------------------------------------------|--------------------------|-------------|---------------------------------------|-----------------|
|                                | Complete PSV (Group A)                                           | Complete PSV + mRNA booster (Group B)        | Complete PSV (Group A)   |             | Complete PSV + mRNA booster (Group B) |                 |
| <b>All products combined</b>   | <b>7 sites;<sup>i</sup> N=524<sup>j</sup></b>                    | <b>2 sites;<sup>k</sup> N=88<sup>l</sup></b> |                          |             |                                       |                 |
| All ≥20 years                  | 103/102; 268/51                                                  | 4/39; 21/24                                  | 52                       | (18 to 71)  | 91                                    | (57 to 98)      |
| Age group                      |                                                                  |                                              |                          |             |                                       |                 |
| 20–59                          | 10/45; 13/14                                                     | 0/16; 1/9                                    | 62                       | (-77 to 92) | NC <sup>e</sup>                       | NC <sup>e</sup> |
| 60–79                          | 43/41; 105/24                                                    | 1/13; 8/13                                   | 68                       | (30 to 85)  | NC <sup>e</sup>                       | NC <sup>e</sup> |
| ≥80                            | 50/16; 150/13                                                    | 3/10; 12/2                                   | 51                       | (-49 to 84) | NC <sup>e</sup>                       | NC <sup>e</sup> |
| Chronic condition <sup>f</sup> |                                                                  |                                              |                          |             |                                       |                 |

|                                |            |                                   |                                  |                 |             |                 |                 |
|--------------------------------|------------|-----------------------------------|----------------------------------|-----------------|-------------|-----------------|-----------------|
|                                | <i>No</i>  | 19/48; 51/13                      | 1/19; 4/4                        | 59              | (-32 to 87) | NC <sup>e</sup> | NC <sup>e</sup> |
|                                | <i>Yes</i> | 84/54; 217/38                     | 3/20; 17/20                      | 50              | (8 to 73)   | 95              | (53 to 99)      |
| <b>Comirnaty PSV</b>           |            | <b>6 sites;<sup>m</sup> N=435</b> | <b>2 sites;<sup>k</sup> N=88</b> |                 |             |                 |                 |
| All ≥20 years                  |            | 80/75; 233/47                     | 4/39; 21/24                      | 54              | (18 to 74)  | 91              | (57 to 98)      |
| Age group                      |            |                                   |                                  |                 |             |                 |                 |
|                                | 20–59      | 4/34; 8/13                        | 0/16; 1/9                        | NC <sup>e</sup> |             | NC <sup>e</sup> | NC <sup>e</sup> |
|                                | 60–79      | 29/34; 86/22                      | 1/13; 8/13                       | 75              | (40 to 89)  | NC <sup>e</sup> | NC <sup>e</sup> |
|                                | ≥80        | 47/7; 139/12                      | 3/10; 12/2                       | 40              | (-97 to 82) | NC <sup>e</sup> | NC <sup>e</sup> |
| Chronic condition <sup>f</sup> |            |                                   |                                  |                 |             |                 |                 |
|                                | <i>No</i>  | 12/29; 43/12                      | 1/19; 4/4                        | 53              | (-86 to 88) | NC <sup>e</sup> | NC <sup>e</sup> |
|                                | <i>Yes</i> | 68/46; 190/35                     | 3/20; 17/20                      | 54              | (10 to 76)  | 95              | (53 to 99)      |

I-MOVE: Influenza – Monitoring vaccine effectiveness in Europe; PSV: primary series vaccination; VE: vaccine effectiveness; VEBIS: Vaccine Effectiveness, Burden and Impact Studies.

\*Analyses 1 and 2 including stratified estimates.

<sup>a</sup>Odds ratio adjusted by study site as a fixed effect, time (restricted cubic spline of swab date, or swab month as a categorical term, depending on model), age or 5-year age group (linear or categorical term depending on model), sex, and presence of at least one of four chronic conditions (asthma, diabetes, heart disease, lung disease).

<sup>b</sup>Seven study sites: Belgium, Croatia, France, Lithuania, Navarra, the Netherlands and Spain.

<sup>c</sup>N=1523 after dropping 102 records from patients with complete vaccination.

<sup>d</sup>N=1469 after dropping 156 records from patients with partial vaccination.

<sup>e</sup>Numbers are too small to provide robust VE estimates when there are ≤ 20 vaccinated cases and controls in total.

<sup>f</sup>In this analysis stratified by chronic condition, the adjustment for presence of at least one chronic condition was removed.

<sup>g</sup>Six study sites: Belgium, Croatia, France, Navarra, the Netherlands and Spain.

<sup>h</sup>None of the participating sites with patients receiving complete vaccination had used Vaxzevria during the Alpha-dominant period.

<sup>i</sup>Seven study sites: Belgium, France, Malta, Navarra, the Netherlands, Portugal and Spain.

<sup>j</sup>N=524 after dropping 2195 records from patients who were not yet in the target group for booster dose vaccination, 220 from those vaccinated <150 days before onset, 107 from those with a booster dose, 106 from patients with partial vaccination, and 124 from sites with <5 cases/controls (or a total of cases and controls <20).

<sup>k</sup>Two study sites: France and Spain.

<sup>l</sup>N=88 after dropping 2195 records from patients who were not yet in the target group for booster dose vaccination, 634 from those with partial vaccination or complete vaccination without booster, 114 from sites with <5 cases/controls (or a total of cases and controls <20) and 80 from one site with no vaccinated cases.

<sup>m</sup>Six study sites: France, Malta, Navarra, the Netherlands, Portugal and Spain.

**Supplementary Table S3.** Target group for primary course vaccination

| Target group for primary course vaccination                                                                                                | Country and date of eligibility |            |            |            |            |            |            |                 |            |
|--------------------------------------------------------------------------------------------------------------------------------------------|---------------------------------|------------|------------|------------|------------|------------|------------|-----------------|------------|
|                                                                                                                                            | Belgium                         | Spain      | France     | Croatia    | Ireland    | Lithuania  | Malta      | the Netherlands | Portugal   |
| Staff <sup>a</sup> and residents in a care home (RCH) for older adults                                                                     | 05/01/2021                      | 27/12/2020 | 27/12/2020 | 27/12/2020 |            | 12/01/2021 | 27/12/2020 |                 |            |
| Staff <sup>a</sup> and RCH for older adults and their carers (adults aged ≥65 years who are residents of long-term care facilities (LTCF)) |                                 |            |            |            | 04/01/2021 |            |            |                 |            |
| Carers working in care homes for older and vulnerable adults <sup>a</sup>                                                                  |                                 |            |            |            | 04/01/2021 |            |            | 06/01/2021      |            |
| RCH for older adults and their carers; <sup>a</sup> professionals and users of the National Integrated Continued Care Network <sup>a</sup> |                                 |            |            |            |            |            |            |                 | 05/01/2021 |
| Disabled people accommodated in specialised establishments and their staff <sup>a</sup> aged ≥50 years and/or with co-morbidities          |                                 |            | 27/12/2020 |            |            |            |            |                 |            |
| Frontline health care workers (HCW; working in direct COVID care)                                                                          |                                 |            |            |            |            |            |            | 06/01/2021      |            |
| Frontline health and social care workers (HSCW) aged ≥50 years or presenting comorbidities                                                 |                                 |            | 04/01/2021 |            |            |            |            |                 |            |
| Frontline HSCW                                                                                                                             |                                 | 01/01/2021 |            | 27/12/2020 | 29/12/2020 | 28/12/2020 |            |                 | 27/12/2020 |
| Frontline HSCW in hospitals                                                                                                                | 08/01/2021                      |            |            |            |            |            |            |                 |            |
| Frontline HSCW in collective institutions and hospital staff other than para/medical <sup>a</sup>                                          | 28/01/2021                      |            |            |            |            |            |            |                 |            |
| Frontline HSCW in primary care <sup>a</sup>                                                                                                | 23/02/2021                      |            |            |            |            |            |            |                 |            |
| Other HSCW not considered frontline <sup>a</sup>                                                                                           |                                 | 21/01/2021 |            |            |            |            |            |                 |            |

|                                                                                                                                                                                                                                                                                                                                                                                                                                                                                                                                                                                                                                                                                              |            |            |            |                          |
|----------------------------------------------------------------------------------------------------------------------------------------------------------------------------------------------------------------------------------------------------------------------------------------------------------------------------------------------------------------------------------------------------------------------------------------------------------------------------------------------------------------------------------------------------------------------------------------------------------------------------------------------------------------------------------------------|------------|------------|------------|--------------------------|
| Frontline HSCW regardless of their age                                                                                                                                                                                                                                                                                                                                                                                                                                                                                                                                                                                                                                                       | 06/02/2021 |            |            |                          |
| HCW and LTCF workers <sup>a</sup> (public and private sector)                                                                                                                                                                                                                                                                                                                                                                                                                                                                                                                                                                                                                                |            |            | 27/12/2020 |                          |
| Mandatory vaccination for frontline HSCW                                                                                                                                                                                                                                                                                                                                                                                                                                                                                                                                                                                                                                                     | 15/09/2021 |            |            |                          |
| Adult working individuals (18–55 years) with an essential society role (police, army, public health and emergency response, teachers, school staff) <sup>a</sup>                                                                                                                                                                                                                                                                                                                                                                                                                                                                                                                             | 09/02/2021 |            |            |                          |
| All other frontliners (other health care professionals including pharmacists, university staff, water service and WasteServ employees, police officers, Armed Forces Malta, Civil Protection Department) <sup>a</sup>                                                                                                                                                                                                                                                                                                                                                                                                                                                                        |            |            | 01/02/2021 |                          |
| Teachers, students <sup>a</sup>                                                                                                                                                                                                                                                                                                                                                                                                                                                                                                                                                                                                                                                              |            |            | 08/02/2021 |                          |
| Staff at schools and child-care centres <sup>a</sup>                                                                                                                                                                                                                                                                                                                                                                                                                                                                                                                                                                                                                                         |            |            | 22/02/2021 | 27/03/2021               |
| Military <sup>a</sup>                                                                                                                                                                                                                                                                                                                                                                                                                                                                                                                                                                                                                                                                        | 09/02/2021 |            | 23/04/2021 | 01/02/2021<br>04/02/2021 |
| Professionals in the armed forces, security forces and critical services <sup>a</sup>                                                                                                                                                                                                                                                                                                                                                                                                                                                                                                                                                                                                        |            |            |            | 04/02/2021               |
| Clinically extremely vulnerable (CEV) individuals                                                                                                                                                                                                                                                                                                                                                                                                                                                                                                                                                                                                                                            | 21/01/2021 | 18/01/2021 | 10/03/2021 | 28/12/2020               |
| Individuals aged ≥16 years or parents of individuals under 16 years of age <sup>a</sup> with chronic illness whose state of health makes them particularly at risk of severe disease or death (insulin-dependent diabetics; <sup>a</sup> patients who are immunosuppressed; cancer patients undergoing chemotherapy; <sup>a</sup> people who have been treated for cancer in the last six months; <sup>a</sup> patients on dialysis; <sup>a</sup> those admitted to hospital for respiratory problems; patients suffering from cardiac disease or who attend the heart failure clinic <sup>a</sup> ; people with Down's syndrome; <sup>a</sup> people who use a BiPap machine <sup>a</sup> ) |            |            |            | 08/02/2021               |
| Other CEV individuals (various sub groups, starting with home-dwelling people with Down's syndrome and morbid obesity <sup>a</sup> )                                                                                                                                                                                                                                                                                                                                                                                                                                                                                                                                                         |            |            |            | 15/02/2021               |

|                                                                                                                                                                                                                                                                                                                                                                                                                                                                                                                              |                 |            |            |            |            |                          |
|------------------------------------------------------------------------------------------------------------------------------------------------------------------------------------------------------------------------------------------------------------------------------------------------------------------------------------------------------------------------------------------------------------------------------------------------------------------------------------------------------------------------------|-----------------|------------|------------|------------|------------|--------------------------|
| People with Down's syndrome, aged ≥16 years <sup>a</sup>                                                                                                                                                                                                                                                                                                                                                                                                                                                                     |                 |            |            |            |            | 24/03/2021               |
| People aged ≥50 years with comorbidities                                                                                                                                                                                                                                                                                                                                                                                                                                                                                     |                 |            | 19/02/2021 |            |            |                          |
| All individuals aged 16–64 years with underlying health conditions which put them at higher risk of serious disease and mortality                                                                                                                                                                                                                                                                                                                                                                                            | 15/04/2021<br>1 | 01/04/2021 |            | 23/02/2021 |            | 08/03/2021               |
| People aged 16–59 years who have an underlying condition that puts them at high risk of severe disease and death                                                                                                                                                                                                                                                                                                                                                                                                             |                 |            |            |            | 22/04/2021 |                          |
| People aged 50–79 years of age with at least one of: coronary heart disease, renal insufficiency, COPD or chronic respiratory disease under ventilatory support and/or long-term oxygen therapy                                                                                                                                                                                                                                                                                                                              |                 |            |            |            |            | 05/01/2021               |
| All those aged ≥18 years with comorbidities                                                                                                                                                                                                                                                                                                                                                                                                                                                                                  |                 |            | 01/05/2021 |            |            |                          |
| People aged ≥16 years, with at least one of: diabetes, obesity (BMI > 35), active malignant neoplasm under treatment, candidates and people with transplanted organs, immunosuppression and primary immunodeficiencies, some severe neurologic diseases, <sup>a</sup> some severe mental disorders (namely psychosis), <sup>a</sup> chronic kidney disease, heart failure (including congenital heart disease) and coronary artery disease, chronic pulmonary disease (many causes), lysosomal storage diseases <sup>a</sup> |                 |            |            |            |            | 10/05/2021               |
| Pregnant women between 14 and 36 weeks pregnant offered vaccine                                                                                                                                                                                                                                                                                                                                                                                                                                                              |                 |            |            |            | 28/05/2021 |                          |
| Birth year 1930 and earlier                                                                                                                                                                                                                                                                                                                                                                                                                                                                                                  |                 |            |            |            |            | 26/01/2021               |
| Birth year 1931–1935                                                                                                                                                                                                                                                                                                                                                                                                                                                                                                         |                 |            |            |            |            | 29/01/2021               |
| All those aged ≥85 years                                                                                                                                                                                                                                                                                                                                                                                                                                                                                                     |                 |            |            |            |            | 27/12/2020               |
| Birth year 1936–1940                                                                                                                                                                                                                                                                                                                                                                                                                                                                                                         |                 |            |            |            |            | 05/02/2021               |
| All those aged ≥80 years                                                                                                                                                                                                                                                                                                                                                                                                                                                                                                     |                 | 01/01/2021 |            |            | 15/02/2021 | 01/02/2021<br>03/02/2021 |
| Birth year 1941–1945                                                                                                                                                                                                                                                                                                                                                                                                                                                                                                         |                 |            |            |            |            | 06/03/2021               |

|                                    |            |            |            |            |            |            |
|------------------------------------|------------|------------|------------|------------|------------|------------|
| All those aged ≥75 years           | 07/03/2021 | 18/01/2021 |            | 08/02/2021 |            |            |
| Birth year 1946–1950               |            |            |            |            |            | 06/04/2021 |
| All those aged ≥70 years           | 01/04/2021 | 27/03/2021 | 15/02/2021 | 03/03/2021 | 01/03/2021 |            |
| Birth year 1951–1955               |            |            |            |            |            | 19/04/2021 |
| All those aged ≥65 years           | 01/03/2021 |            | 23/02/2021 | 08/03/2021 |            | 30/03/2021 |
| Birth year 1956–1960 invited by GP | 1          |            |            |            |            | 15/02/2021 |
| All those aged ≥60 years           |            |            | 22/04/2021 |            | 01/03/2021 | 29/04/2021 |
| Birth year 1961–1965               |            |            |            |            |            | 27/04/2021 |
| All those aged ≥55 years           | 22/03/2021 | 12/04/2021 |            | 10/05/2021 |            | 13/05/2021 |
| Birth year 1966–1970               |            |            |            |            |            | 20/05/2021 |
| All those aged ≥50 years           | 07/04/2021 | 10/05/2021 | 15/05/2021 |            | 10/04/2021 | 24/05/2021 |
| Birth year 1971–1975               |            |            |            |            |            | 26/05/2021 |
| All those aged ≥45 years           |            |            | 18/05/2021 | 17/05/2021 |            | 02/06/2021 |
| Birth year 1976-1980               |            |            |            |            |            | 29/05/2021 |
| All those aged ≥40 years           | 08/05/2021 | 10/06/2021 | 02/06/2021 |            | 20/04/2021 | 15/06/2021 |
| Birth year 1981–1985               | 1          |            |            |            |            | 01/06/2021 |
| All those aged ≥35 years           |            |            | 20/06/2021 | 24/05/2021 |            | 23/06/2021 |
| Birth year 1986–1990               |            |            |            |            |            | 07/06/2021 |
| All those aged ≥33 years           |            |            |            |            |            | 28/06/2021 |
| All those aged ≥30 years           | 01/07/2021 |            | 07/07/2021 |            | 04/05/2021 |            |
| Birth year 1991–1995               |            |            |            |            |            | 11/06/2021 |
| All those aged ≥25 years           |            |            | 16/07/2021 |            |            |            |
| All those aged ≥20 years           | 10/07/2021 |            |            |            |            |            |





Immunocompromised individuals: third dose as a part of primary vaccination; dose 3 to be given at least 4 weeks after dose 2 (preferably 8 weeks)

12/10/2021

---

<sup>a</sup>Insufficient information in dataset to code this target group

**Supplementary Table S4.** Target group for first booster vaccination

| Target group for first booster vaccination                                                                                                      | Date of eligibility in each country |            |            |                                                         |            |            |            |                 |            |
|-------------------------------------------------------------------------------------------------------------------------------------------------|-------------------------------------|------------|------------|---------------------------------------------------------|------------|------------|------------|-----------------|------------|
|                                                                                                                                                 | Belgium                             | Spain      | France     | Croatia                                                 | Ireland    | Lithuania  | Malta      | the Netherlands | Portugal   |
| Mandatory delay from last primary course dose                                                                                                   |                                     |            | 5 months   | 3–6 months<br>(2 months if primary vaccination Jcovden) |            | 180 days   |            |                 |            |
| Residents in residential structures for the elderly and similar institutions                                                                    |                                     |            |            | 12/10/2021                                              |            |            |            |                 | 11/10/2021 |
| Residents in a care home for older adults                                                                                                       | 06/10/2021                          | 16/09/2021 | 01/09/2021 | 12/10/2021                                              |            |            | 06/09/2021 | 22/11/2021      |            |
| Institutionalised patients                                                                                                                      |                                     |            |            | 12/10/2021                                              |            | 13/09/2021 |            |                 |            |
| Other residents in long term care facilities                                                                                                    |                                     | 23/11/2021 |            |                                                         |            |            |            |                 |            |
| All those aged ≥65 years who are residents and staff <sup>a</sup> of long-term care facilities (LTCF)                                           |                                     |            |            |                                                         | 27/09/2021 |            |            |                 |            |
| All those 65 years of age and over and health professionals                                                                                     |                                     |            |            | 12/10/2021                                              |            |            |            |                 |            |
| Staff in a care home for older adults <sup>a</sup>                                                                                              | 31/10/2021                          |            | 01/09/2021 | 12/10/2021                                              |            |            |            |                 |            |
| Health and social care workers (HSCW)                                                                                                           | 15/11/2021                          | 23/11/2021 |            | 12/10/2021                                              | 25/11/2021 | 13/09/2021 | 08/11/2021 | 03/12/2021      |            |
| Frontline HSCW                                                                                                                                  |                                     |            | 06/10/2021 |                                                         |            |            |            |                 |            |
| Staff at schools and child-care centres <sup>a</sup>                                                                                            |                                     |            |            |                                                         |            |            | 15/11/2021 |                 |            |
| Clinically extremely vulnerable individuals                                                                                                     |                                     |            | 01/09/2021 | 12/10/2021                                              |            |            |            |                 |            |
| All those with increased medical risk <sup>a</sup>                                                                                              |                                     |            |            | 12/10/2021                                              |            |            |            | 23/12/2021      |            |
| High-risk patients (immunosuppressive, after treatment, <sup>a</sup> haematologic cancer patients (on treatment or <24 months after treatment), |                                     |            |            |                                                         |            | 08/08/2021 |            |                 |            |

|                                                                                                                                             |            |            |            |            |           |            |            |            |
|---------------------------------------------------------------------------------------------------------------------------------------------|------------|------------|------------|------------|-----------|------------|------------|------------|
| terminal CKD patients, <sup>a</sup> patients on dialysis <sup>a</sup> )<br>final primary course dose vaccination at least<br>180 days prior |            |            |            |            |           |            |            |            |
| Individuals with immune deficiency/<br>immunocompromised                                                                                    | 09/09/2021 |            |            | 12/10/2021 |           |            | 13/09/2021 | 01/09/2021 |
| Individuals in contact with<br>immunocompromised patients <sup>a</sup>                                                                      |            |            | 06/10/2021 | 12/10/2021 |           |            |            |            |
| Adults with Down's syndrome who live at<br>home <sup>a</sup>                                                                                |            |            |            |            |           |            | 03/12/2021 |            |
| All those aged 16–59 years with underlying<br>conditions and all residents of LTCF                                                          |            |            |            |            |           | 15/11/2021 |            |            |
| People aged ≥12 years with a serious<br>immune disorder, who were under care of a<br>medical specialist                                     |            |            |            |            | 21/1/2022 |            | 06/01/2022 |            |
| All pregnant women aged ≥16 years                                                                                                           |            |            |            |            |           | 20/12/2021 |            |            |
| All those with primary series of vaccination<br>with JCOvden                                                                                | 15/11/2021 | 02/11/2021 | 01/09/2021 | 12/10/2021 |           |            |            |            |
| All those aged ≥18 years with primary series<br>of vaccination with JCOvden                                                                 |            |            |            |            |           |            |            | 23/11/2021 |
| All with primary series of vaccination with<br>Vaxzevria                                                                                    | 15/11/2021 | 15/12/2021 |            |            |           |            |            |            |
| All those with final primary course dose at<br>least 120 days prior for Comirnaty or<br>JCOvden, 180 days for Spikevax                      |            |            |            |            |           |            | 17/11/2021 |            |
| Birth year 1930 and earlier                                                                                                                 |            |            |            |            |           |            | 18/11/2021 |            |
| Birth year 1931–1935                                                                                                                        |            |            |            |            |           |            | 19/11/2021 |            |
| Birth year 1936–1940                                                                                                                        |            |            |            |            |           |            | 23/11/2021 |            |
| All those aged ≥80 years                                                                                                                    |            |            |            |            |           | 27/09/2021 |            |            |
| Birth year 1941–1945                                                                                                                        |            |            |            |            |           |            | 02/12/2021 |            |

|                          |            |            |            |            |            |            |            |
|--------------------------|------------|------------|------------|------------|------------|------------|------------|
| Birth year 1946–1950     |            |            |            |            |            |            | 08/12/2021 |
| All those aged ≥70 years |            | 18/10/2021 |            |            |            | 27/09/2021 |            |
| Birth year 1951–1955     |            |            |            |            |            |            | 10/12/2021 |
| All those aged ≥65 years | 04/10/2021 | 23/11/2021 | 01/09/2021 |            | 13/09/2021 |            | 11/10/2021 |
| Birth year 1956–1960     |            |            |            |            |            |            | 12/12/2021 |
| All those aged ≥60 years |            | 23/11/2021 |            |            | 05/11/2021 | 15/11/2021 |            |
| Birth year 1961–1965     |            |            |            |            |            |            | 14/12/2021 |
| All those aged ≥55 years |            |            |            |            |            |            |            |
| Birth year 1966–1970     |            |            |            |            |            |            | 23/12/2021 |
| All those aged ≥50 years |            | 15/12/2021 |            |            | 09/12/2021 | 29/11/2021 | 14/12/2021 |
| Birth year 1971–1975     |            |            |            |            |            |            | 25/12/2021 |
| Birth year 1976–1980     |            |            |            |            |            |            | 26/12/2021 |
| All those aged ≥40 years |            | 10/01/2022 |            |            | 19/12/2021 |            |            |
| Birth year 1981–1985     |            |            |            |            |            |            | 28/12/2021 |
| All those aged ≥35 years |            |            |            |            |            | 20/12/2021 |            |
| Birth year 1986–1990     |            |            |            |            |            |            | 30/12/2021 |
| All those aged ≥30 years |            |            |            |            | 29/12/2021 |            |            |
| Birth year 1991–1995     |            |            |            |            |            |            | 01/01/2022 |
| Birth year 1996–2003     |            |            |            |            |            |            | 02/01/2022 |
| All those aged ≥18 years | 01/12/2021 | 13/01/2022 | 27/11/2021 | 07/09/2022 |            | 25/12/2021 | 22/12/2021 |
| All those aged ≥16 years |            |            |            |            | 02/01/2022 |            |            |
| Birth year 2004–2010     |            |            |            |            |            |            | 06/01/2022 |
| All those aged ≥12 years |            | 01/03/2022 |            |            | 21/02/2022 |            |            |

Children aged  $\geq 12$  years with increased risk  
for severe COVID-19 due to underlying  
medical conditions

07/09/2022

Children aged 5–11 years who are  
immunocompromised

01/08/2022

---

<sup>a</sup>Insufficient information in dataset to code this target group.
